# Supplementary material
Source: PubMed Central journal article supplement (PMC6606467)
Supplement: rstb20180543supp1.pdf [file rstb20180543supp1.pdf]

## Supplementary information

### *Data screening*

Any measurements made under known stressors, such as unnatural salinities, extreme temperatures or hypoxic conditions were excluded. At extreme temperatures, cephalopods are unable to increase their oxygen consumption to match oxygen demands. However, none of the studies included here reported instances where animals encountered hypoxic stress caused by limitations in meeting oxygen demands due to high temperatures [1]. Additionally, we only included those results from experiments performed on animals which had been fasted beforehand for periods of between 6 - 24 h to minimise the effect of feeding on oxygen consumption, as respiration is typically elevated post-feeding due to specific dynamic action [2]. Experiments in which animals were fed during the measurement period were thus excluded (see Table S2). Stress effects from handling were minimised by only accepting data for animals that were allowed an acclimation period 0.25 – 168h in the respiratory chamber. The lower acclimation time limit was sufficient for *Octopus vulgaris* to settle on the experimental chamber floor and achieve a constant rate of oxygen consumption [3]. The upper time limit allowed acclimation of field-captured octopus to their new environment in substrate-containing (i.e. natural den-simulating) holding tanks where respiration measurements were subsequently carried out [4]. In one species (*Illex illecebrosus*), the  $b_R$  values were obtained from the equation relating oxygen consumption rates to body mass and activity by extrapolating to a zero activity [5,6]. When mass-specific respiration rate-body mass relationships were reported, rates were converted to respiration rates per individual. If multiple studies on a single species combined data together for calculating  $b_R$ , only  $b_R$  calculated from the most recent study was included in the data set, only  $b_R$  calculated from the most recent study was included in the data set. This occurred when new measurements for a species were integrated with previously published data to update the regression for the most

recent study. However, we avoided aggregating data from multiple studies for single species into new regressions ourselves to avoid combining data from different conditions. When necessary, raw data for the regressions were extracted from published figures using a web-based plot digitiser, WebPlotDigitizer [7].

### ***The mass range for $b_R$***

The body-mass range influences the accuracy of scaling regressions and therefore scaling exponents ( $b_R$ ); generally the variability of  $b_R$  decreases as the mass range increases [8–10]. As most of the reduction in the standard deviation of  $b_R$  occurs when the mass range exceeds 1 order of magnitude [9],  $b_R$  values were omitted when mass ranges covered less than one order of magnitude or were not reported (following [11]). This additional screening step removed two species, and representation of one family. The relationship between  $\ln L$  and  $b_R$  [ $r^2 = 0.218$ ,  $p = 0.033$ ,  $n = 21$ ,  $b_R = 0.621$  (95% CI: 0.526, 0.716) + 0.049 (95% CI: 0.028, 0.069) x  $\ln L_R$ ], or between  $b_R$  and  $1/b_L$  [ $r^2 = 0.542$ ,  $p = 0.015$ ,  $b_R = 0.215$  (95% CI: -0.123, 0.552) + 1.650 (95% CI: 0.740, 2.561) x  $1/b_L$ ] are not materially affected, suggesting that the patterns found were robust. In general, the additional screening step improved the  $r^2$  values of the relationships.

### ***Lifestyle categorisation***

Following [12], cephalopod species were categorised into pelagic, benthopelagic, benthic or bathypelagic lifestyles. Pelagic species live in the water column and often feed near the surface. Benthopelagic species occupy shelf waters, feeding, living near the bottom, but rarely rest on the bottom. Depending on depth, they are also associated with mid- and surface waters. Benthic species live on the bottom and are in direct contact with substrates.

Bathypelagic species are deep-living species at depths of approximately 1000-5000 m. Data

and species description used to classify the lifestyle of each species were obtained from relevant literature (Table A2).

### ***Phylogenetic tree construction***

The phylogenetic tree (fig. S1) was compiled following published phylogenies [13–17] based on molecular data. Branch length was calculated following [18].

### ***Calculation of mass ranges for Figure 5***

As the mass range of metabolic rate-body mass relationships differ between studies for species with more than one  $b_R$  value, the minimum and maximum mass plotted in Fig. 5 was based on the average minimum and maximum masses of multiple mass ranges. For instance, minimum mass of *Sepia officinalis* based on six metabolic rate-body mass relationships ranged from 0.1 – 15.00 g. The arithmetic mean of the six minimum mass values was then used as the minimum mass for the metabolic rate-body mass relationship for *Sepia officinalis* in Fig. 5.

## References

1. Melzner F, Bock C, Pörtner HO. 2007 Allometry of thermal limitation in the cephalopod *Sepia officinalis*. *Comp. Biochem. Physiol. A. Mol. Integr. Physiol.* **146**, 149–154. (doi:10.1016/j.cbpa.2006.07.023)
2. Cerezo Valverde J, García García B. 2004 Influence of body weight and temperature on post-prandial oxygen consumption of common octopus (*Octopus vulgaris*). *Aquaculture* **233**, 599–613. (doi:10.1016/j.aquaculture.2003.11.025)
3. Maginniss LA, Wells MJ. 1969 The oxygen consumption of *Octopus cyanea*. *J. Exp. Biol.* **51**, 607–613.
4. Katsanevakis S, Stephanopoulou S, Miliou H, Moraitou-Apostolopoulou M, Verriopoulos G. 2005 Oxygen consumption and ammonia excretion of *Octopus vulgaris* (Cephalopoda) in relation to body mass and temperature. *Mar. Biol.* **146**, 725–732. (doi:10.1007/s00227-004-1473-9)
5. Webber DM, O’Dor RK. 1986 Monitoring the metabolic rate and activity of free-swimming squid with telemetered jet pressure. *J. Exp. Biol.* **224**, 205–224.
6. Webber DM, O’Dor RK. 1985 Respiration and swimming performance of short-finned squid (*Illex illecebrosus*). *NAFO Sci Coun Stud.* **9**, 133–138.
7. Rohatgi A. 2018 WebPlotDigitizer. See <http://arohatgi.info/WebPlotDigitizer> (accessed on 1 June 2017).
8. Bokma F. 2004 Evidence against universal metabolic allometry. *Funct. Ecol.* **18**, 184–187. (doi:10.1111/j.0269-8463.2004.00817.x)
9. White CR, Seymour RS. 2005 Sample size and mass range effects on the allometric exponent of basal metabolic rate. *Comp. Biochem. Physiol. A. Mol. Integr. Physiol.* **142**, 74–78. (doi:10.1016/j.cbpa.2005.07.013)
10. Moses ME, Hou C, Woodruff WH, West GB, Nekola JC, Zuo W, Brown JH. 2008 Revisiting a model of ontogenetic growth: Estimating model parameters from theory and data. *Am. Nat.* **171**, 632–645. (doi:10.1086/587073)
11. Hirst AG, Glazier DS, Atkinson D. 2014 Body shape shifting during growth permits tests that distinguish between competing geometric theories of metabolic scaling. *Ecol. Lett.* **17**, 1274–1281. (doi:10.1111/ele.12334)
12. Killen SS, Atkinson D, Glazier DS. 2010 The intraspecific scaling of metabolic rate with body mass in fishes depends on lifestyle and temperature. *Ecol. Lett.* **13**, 184–193. (doi:10.1111/j.1461-0248.2009.01415.x)
13. Ibáñez CM, Rezende EL, Sepúlveda RD, Avaria-Llautureo J, Hernández CE, Sellanes J, Poulin E, Pardo-Gandarillas MC. 2018 Thorson’s rule, life history evolution and diversification of benthic octopuses (Cephalopoda: Octopodoidea). *Evolution*, evo.13559. (doi:10.1111/evo.13559)

14. Lindgren AR, Pankey MS, Hochberg FG, Oakley TH. 2012 A multi-gene phylogeny of Cephalopoda supports convergent morphological evolution in association with multiple habitat shifts in the marine environment. *BMC Evol. Biol.* **12**, 129. (doi:10.1186/1471-2148-12-129)
15. Lindgren AR, Katugin ON, Amezcua E, Nishiguchi MK. 2005 Evolutionary relationships among squids of the family Gonatidae (Mollusca: Cephalopoda) inferred from three mitochondrial loci. *Mol. Phylogenet. Evol.* **36**, 101–111. (doi:10.1016/j.ympev.2004.12.009)
16. Sanchez G *et al.* 2018 Genus-level phylogeny of cephalopods using molecular markers: current status and problematic areas. *PeerJ* **6**, e4331. (doi:10.7717/peerj.4331)
17. Wakabayashi T, Suzuki N, Sakai M, Ichii T, Chow S. 2012 Phylogenetic relationships among the family Ommastrephidae (Mollusca: Cephalopoda) inferred from two mitochondrial DNA gene sequences. *Mar. Genomics* **7**, 11–16. (doi:10.1016/j.margen.2012.04.005)
18. Grafen A. 1989 The phylogenetic regression. *Philos. Trans. R. Soc. Lond. B Biol. Sci.* **326**, 119–157. (doi:10.1098/rstb.2010.0374)

## Figure legends

**Figure S1** Phylogenetic tree of cephalopod species in our data set.

**Figure S2** The range of logged wet masses for each mass-length and respiration-mass regression from which  $b_L$  and  $b_R$  values were derived. The correlation coefficients ( $r$ ) of each regression are shown on the right-hand axis. In cases where multiple regressions were available and regression exponents were derived as arithmetic means, the mass range reflected is based on the mean minimum and maximum mass of all the regressions. The different lifestyles are represented by black (pelagic), red (benthopelagic), green (benthic) and blue (bathypelagic) symbols. The mass range for the respiration-mass relationship of *Onychoteuthis banksii* was not reported.

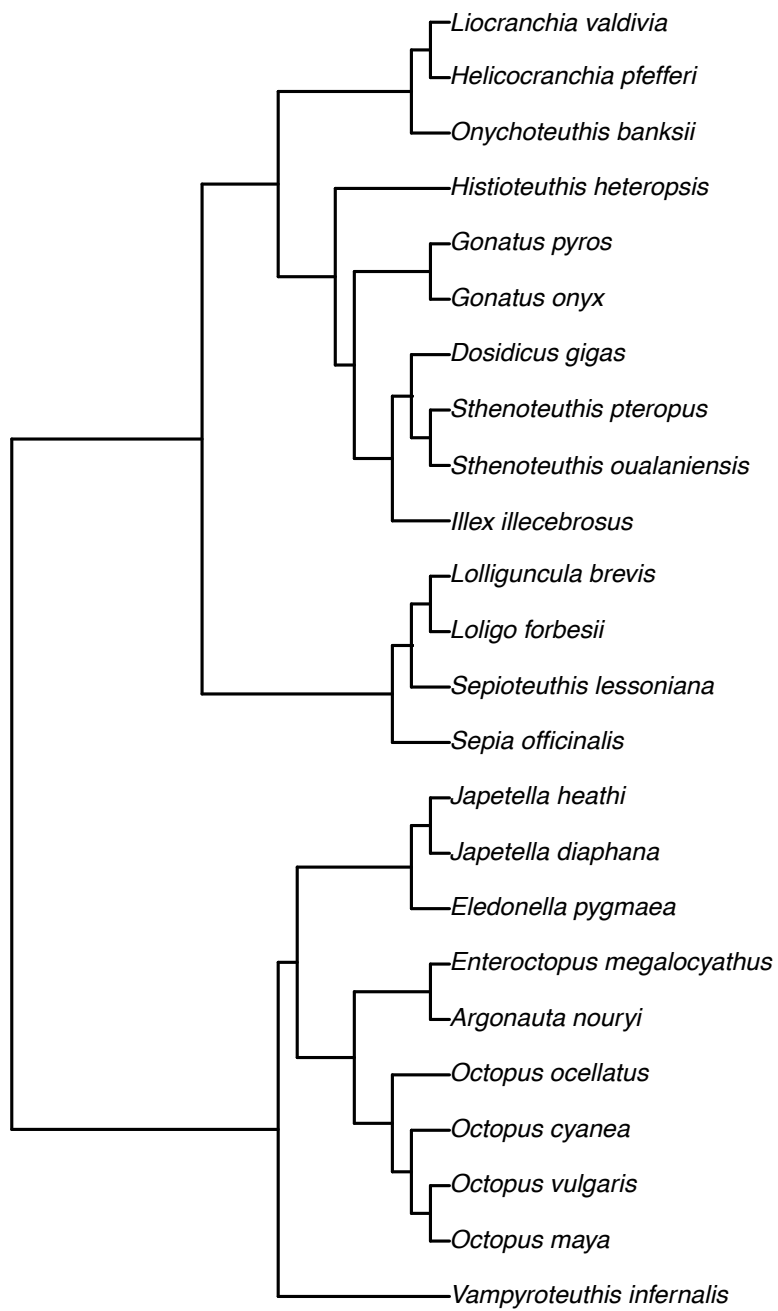

Figure S1

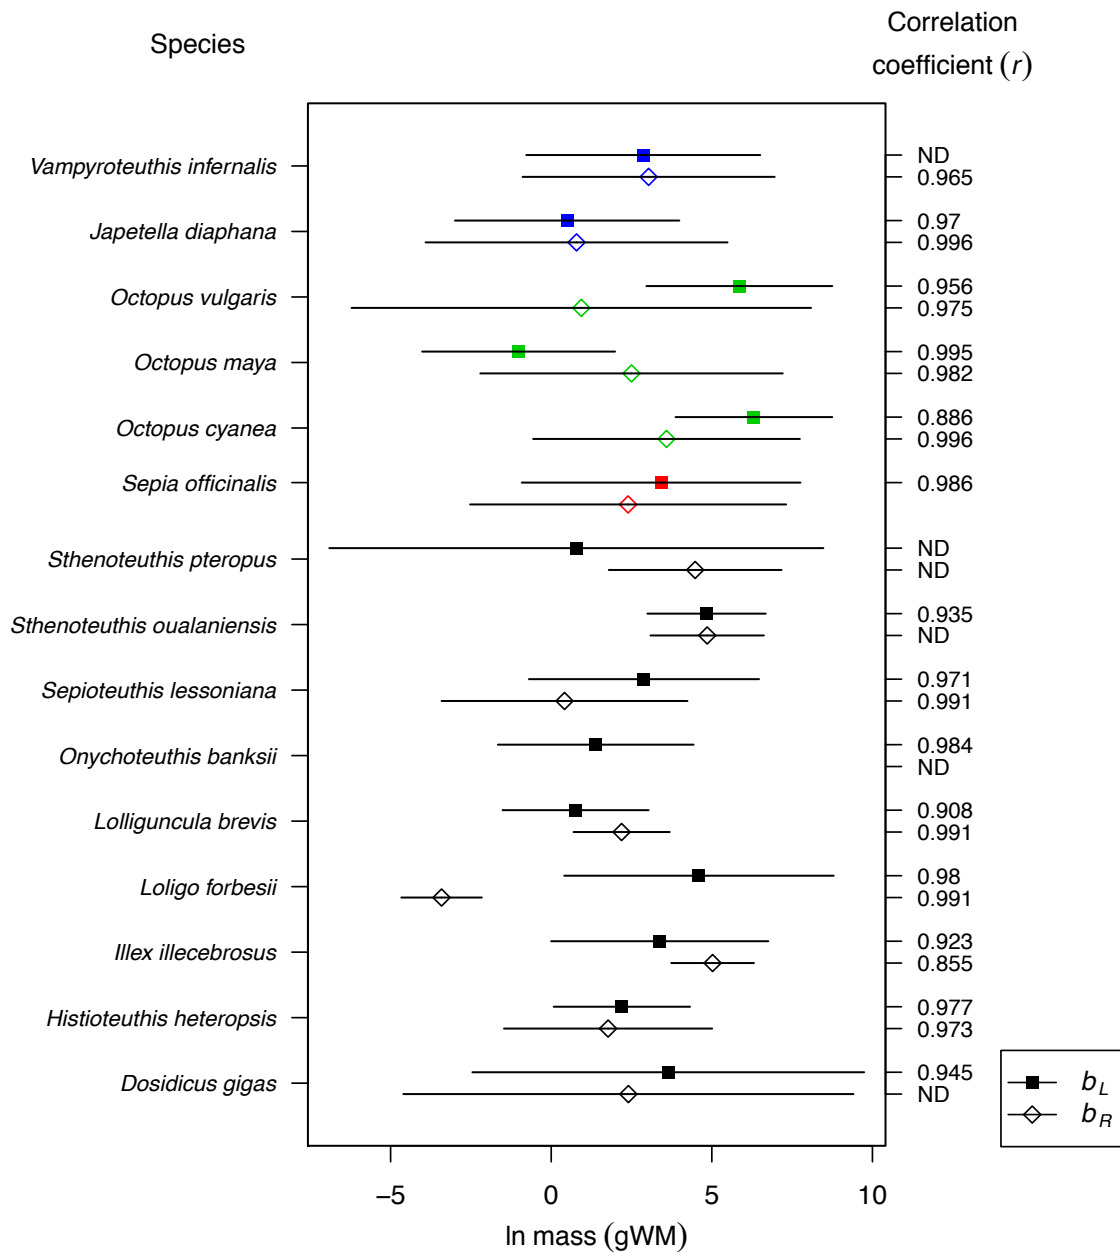

Figure S2
